# Supplementary material for: Mechanistic Insights in NeuroD Potentiation of Mineralocorticoid Receptor Signaling
Source: PubMed Central journal article supplement (PMC6479562; doi:10.3390/ijms20071575), 2019-03-29
Supplement: ijms-20-01575-s001.pdf [file ijms-20-01575-s001.pdf]

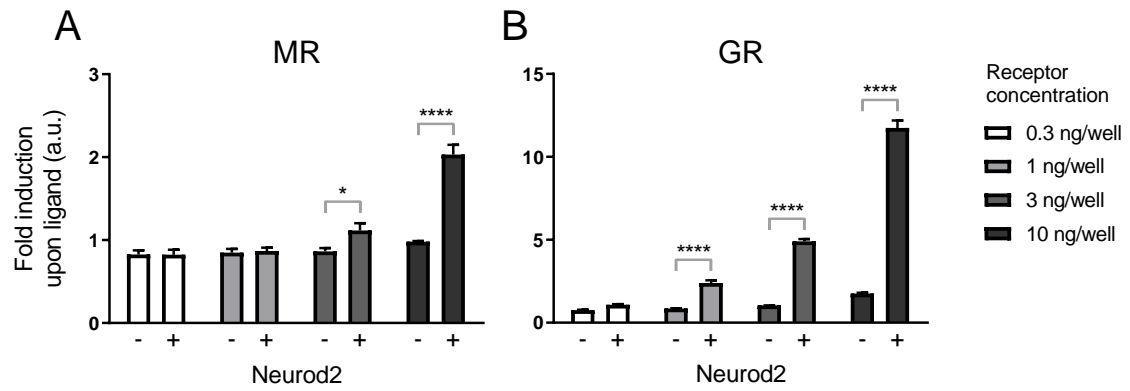

**Figure S1.** Neurod2 effect as a result of nuclear receptor titration for (A) MR and (B) GR. HEK293 cells were transfected with GRE-At\_GC luciferase construct, and various amounts of MR or GR (0.3-1-3-10 ng/well), with or without Neurod2 (10 ng/well), and stimulated with corticosterone ( $10^{-7}$  M). Data are presented as luciferase activity fold induction upon corticosterone treatment. a.u. = arbitrary unit; \*  $P < 0.05$ , \*\*\*\*  $P < 0.0001$
